# Supplementary material
Source: Springer Nature journal article supplement (https://www.springermedizin.de/resource/supplementary/12891_2011_1268_MOESM1_ESM.pdf/9507494)
Supplement: MOESM1 [file 9507494]

Selection

Inclusion

Measurements

**Step 1**  
A software programme will identify patients of 65 years or older, with at least two chronic conditions, in the GP registration system (see table 1)

**Step 2**  
The GP will check if the ICPC codes of the selected patients (step 1) are up to date/active and applies the exclusion criteria

**Exclusion:**  
- Only one chronic condition present  
- At least one exclusion criteria present

**Step 3**  
The selected patients (step 1- 2) receive a screening questionnaire for joint pain

**Exclusion:**  
- No joint pain at all  
- No joint pain on most days  
- No consent for further contact  
- Non responders

**Inclusion (n=450)**  
- 65+ patients  
- At least two chronic conditions  
- Joint pain on most days  
- Consent for further contact

- No consent  
- Not able to make an appointment

**Quantitative methods**

**Qualitative methods**

**Baseline assessment:**  
Questionnaire, physical tests, interview

**Focus group meetings (n=25)**

**Follow up assessments:**  
(6, 12, 18 months)  
Questionnaires
